# Supplementary material for: Muscle prestimulation tunes velocity preflex in simulated perturbed hopping
Source: PubMed Central journal article supplement (PMC10027857; doi:10.1038/s41598-023-31179-6), 2023-03-20
Supplement: 41598_2023_31179_MOESM1_ESM.pdf [file 41598_2023_31179_MOESM1_ESM.pdf]

## Electronic supplementary material

# Muscle prestimulation tunes velocity reflex in simulated perturbed hopping

Fabio Izzi<sup>1,2,\*</sup>, An Mo<sup>2</sup>, Syn Schmitt<sup>3</sup>, Alexander Badri-Spröwitz<sup>2,4</sup>, Daniel F. B. Haeufle<sup>1,3</sup>

<sup>1</sup>Hertie Institute for Clinical Brain Research and Center for Integrative Neuroscience, University of Tübingen, Tübingen, Germany

<sup>2</sup>Dynamic Locomotion Group, Max Planck Institute for Intelligent Systems, Stuttgart, Germany

<sup>3</sup>Institute for Modelling and Simulation of Biomechanical Systems, University of Stuttgart, Stuttgart, Germany

<sup>4</sup>Department of Mechanical Engineering, KU Leuven, Leuven, Belgium

\*Corresponding author's address: izzi@is.mpg.de

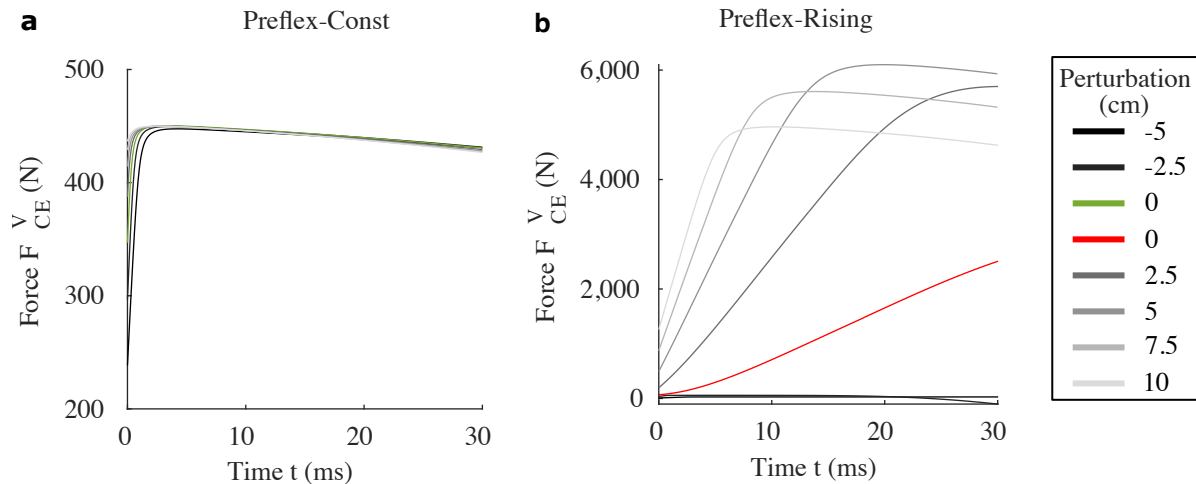

Fig. S1: Time trajectories of the force component produced by the force-velocity relation ( $F_{CE}^V$ ). Data plotted from touch-down ( $t = 0ms$ ) to the end of the preflex duration ( $t = 30ms$ ). (a) Preflex-Const, with reference hopping case in green; (b) Preflex-Rising, with reference hopping case in red.

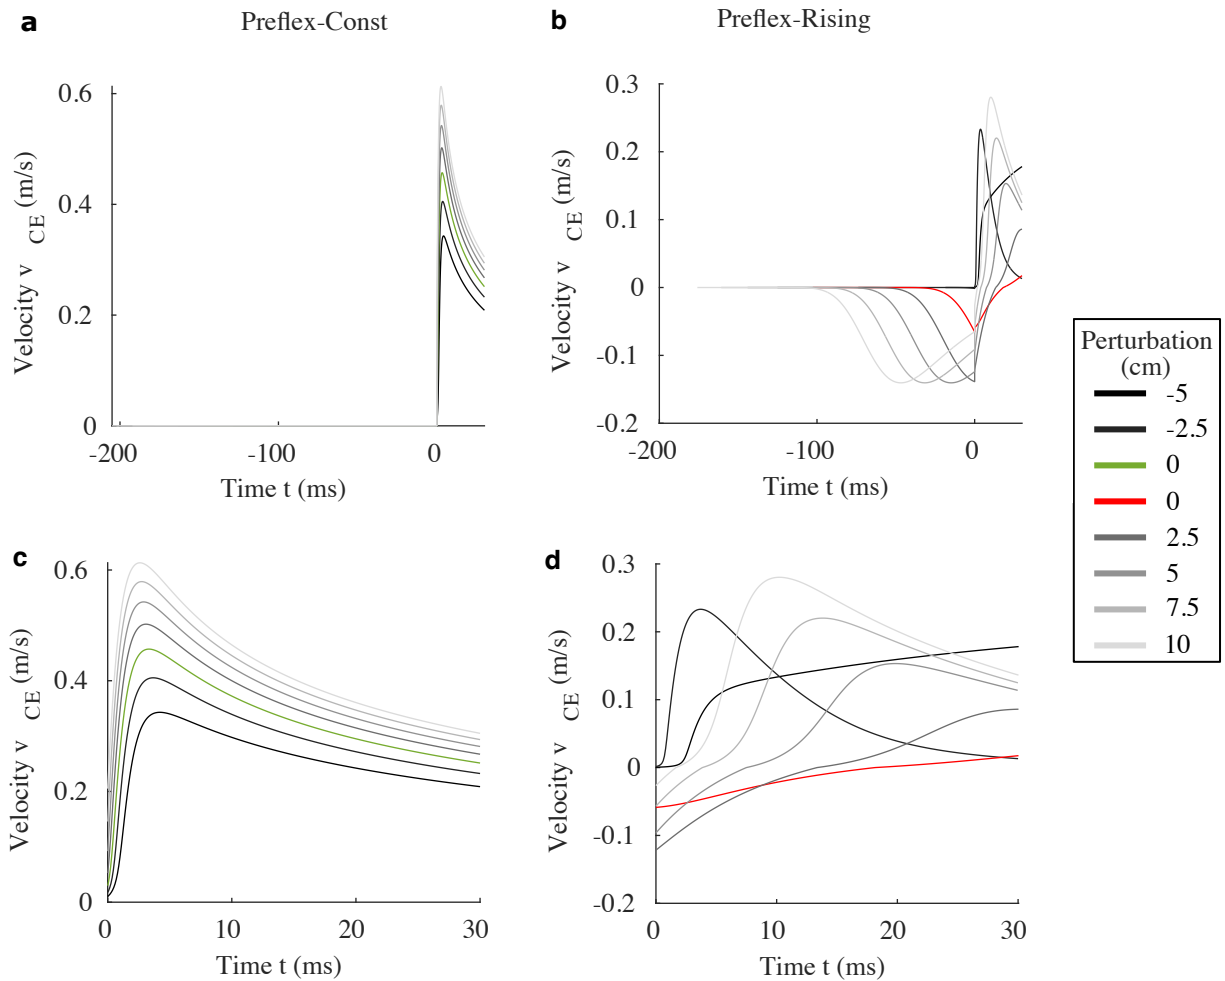

Fig. S2: (a,b) Time trajectories of the muscle fibre velocity ( $v_{CE}$ ). Data plotted from the start of the leg's vertical fall to the end of the preflex duration ( $t = 30ms$ ). All dataset are centered to the touch-down event ( $t = 0ms$ ). (c,d) Close up (touch-down to preflex end) of the time trajectories of the muscle fibre velocity ( $v_{CE}$ ). (a,c) Preflex-Const, with reference hopping case in green; (b,d) Preflex-Rising, with reference hopping case in red.

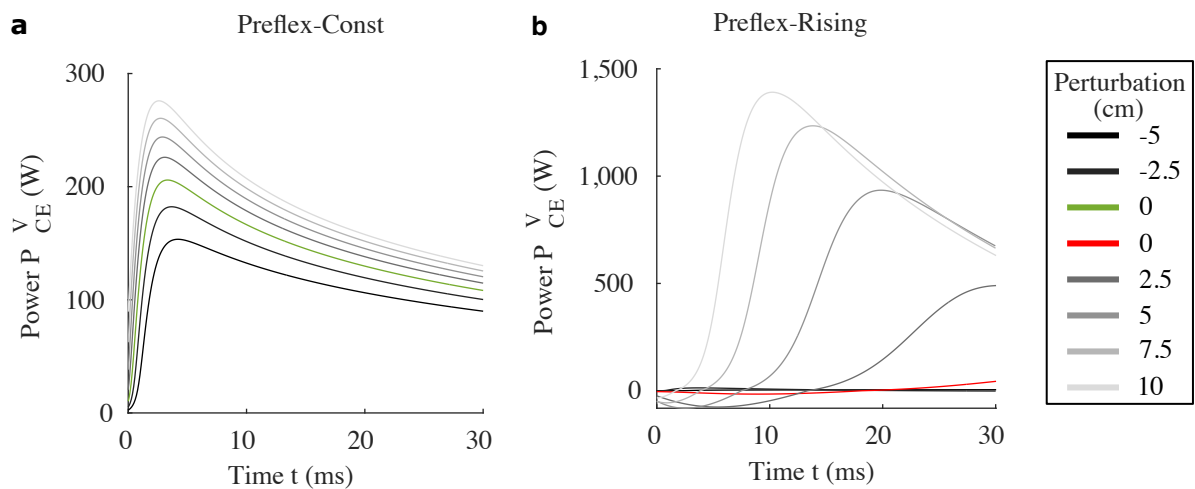

Fig. S3: Time trajectories of the muscle fibre power component produced by the force-velocity relation ( $P_{CE}^V = F_{CE}^V \cdot v_{CE}$ ). Data plotted from touch-down ( $t = 0ms$ ) to the end of the preflex duration ( $t = 30ms$ ). (a) Preflex-Const, with reference hopping case in green; (b) Preflex-Rising, with reference hopping case in red.

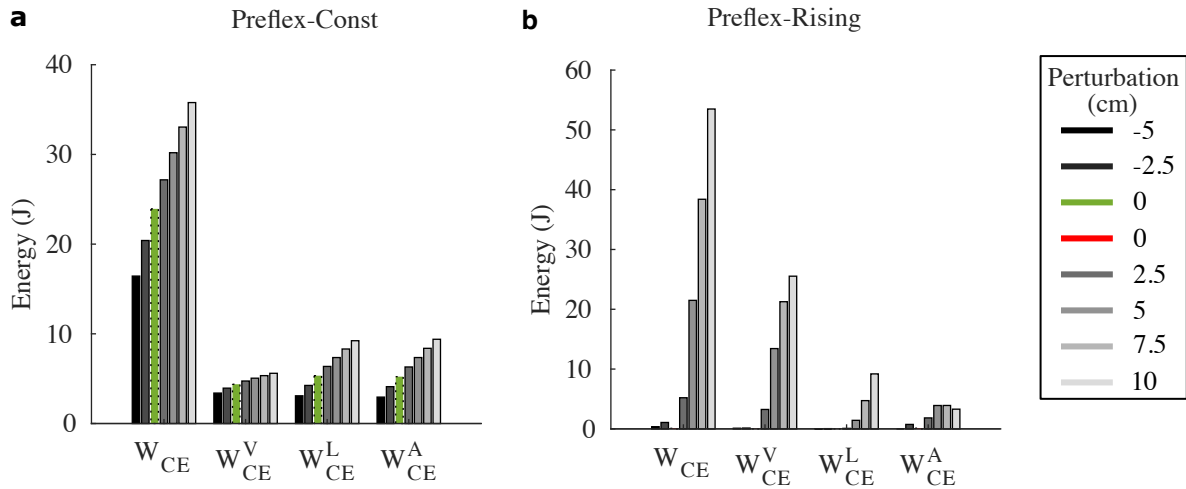

Fig. S4: Work dissipated by the muscle fibres during the preflex phase.  $W_{CE}$  is the net dissipated work;  $W_{CE}^V$  is the work component dissipated by the force-velocity relation,  $W_{CE}^L$  by the force-length relation, and  $W_{CE}^A$  by the muscle activity. (a) Preflex-Const, with reference hopping case in green; (b) Preflex-Rising, with reference hopping case in red.

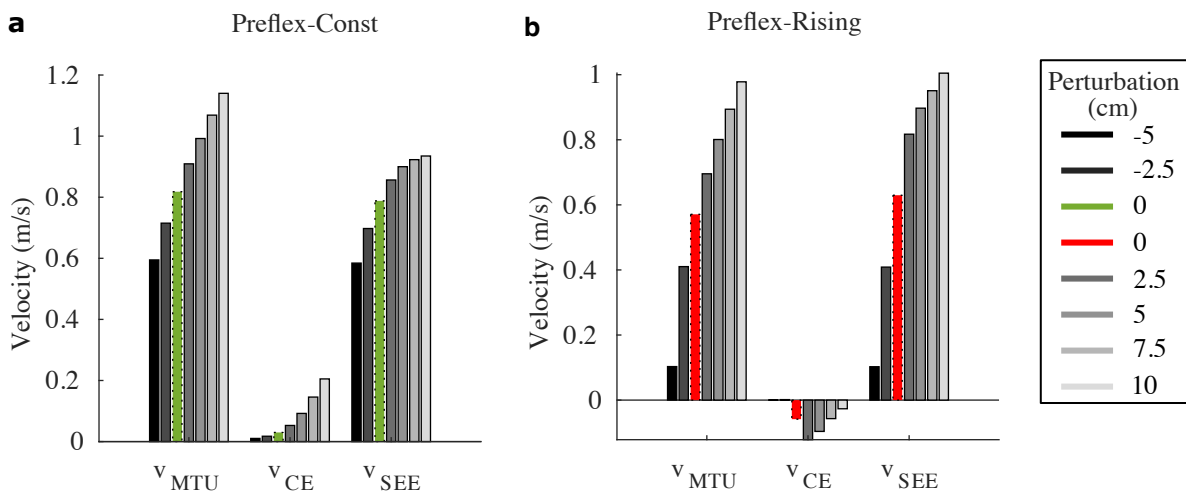

Fig. S5: Touch-down values of muscle-tendon unit velocity ( $v_{MTU}$ ), muscle fibre velocity ( $v_{CE}$ ) and tendon fibre velocity ( $v_{SEE}$ ). (a) Preflex-Const, with reference hopping case in green; (b) Preflex-Rising, with reference hopping case in red.

TABLE S1: Table of supplementary parameters used in the muscle model and activation dynamics (Hatze).

|                     | Parameter            | Unit                  | Value         | Source                                                   | Description                                                                                         |
|---------------------|----------------------|-----------------------|---------------|----------------------------------------------------------|-----------------------------------------------------------------------------------------------------|
| MTU                 | $l_{MTU,ref}$        | m                     | 0.5           | Geyer et al. (2003)                                      | muscle-tendon unit's reference length, alias $l_{ref}$ in Geyer et al. (2003)                       |
| CE                  | $\Delta W^{des}$     | [ ]                   | 0.45          | similar to Bayer et al. (2017); Kistemaker et al. (2006) | width of normalized bell curve in descending branch, adapted to match observed force-length curves  |
|                     | $\Delta W^{asc}$     | [ ]                   | 0.45          | similar to Bayer et al. (2017); Kistemaker et al. (2006) | width of normalized bell curve in ascending branch, adapted to match observed force-length curves   |
|                     | $\nu_{CE,des}$       | [ ]                   | 1.5           | Mörl et al. (2012)                                       | exponent for descending branch of force-length relation                                             |
|                     | $\nu_{CE,asc}$       | [ ]                   | 3.0           | Mörl et al. (2012)                                       | exponent for ascending branch of force-length relation                                              |
|                     | $A_{rel,0}$          | [ ]                   | 0.2           | Bayer et al. (2017)                                      | parameter for contraction dynamics: maximum value of $A_{rel}$                                      |
|                     | $B_{rel,0}$          | 1/s                   | 2.0           | Bayer et al. (2017)                                      | parameter for contraction dynamics: maximum value of $B_{rel}$                                      |
|                     | $\mathcal{S}_{ecc}$  | [ ]                   | 2.0           | Soest and Bobbert (1993)                                 | ratio of the derivatives of the force-velocity relation at the transition point ( $v_{CE} = 0$ m/s) |
|                     | $\mathcal{F}_{ecc}$  | [ ]                   | 1.5           | Soest and Bobbert (1993)                                 | factor by which the force can exceed $F_{isom}$ for large eccentric velocities                      |
|                     | PEE                  | $\mathcal{L}_{PEE,0}$ | [ ]           | 0.95                                                     | Bayer et al. (2017)                                                                                 |
| $\nu_{PEE}$         |                      | [ ]                   | 2.5           | Mörl et al. (2012)                                       | exponent of $F_{PEE}$                                                                               |
| $\mathcal{F}_{PEE}$ |                      | [ ]                   | 2.0           | Mörl et al. (2012)                                       | force of PEE if $l_{CE}$ is stretched to $\Delta W_{des}$                                           |
| SDE                 | $D_{SDE}$            | [ ]                   | 0.3           | Mörl et al. (2012)                                       | dimensionless factor to scale $d_{SDE,max}$                                                         |
|                     | $R_{SDE}$            | [ ]                   | 0.01          | Mörl et al. (2012)                                       | minimum value of $d_{SDE}$ (at $F_{MTU} = 0$ N), normalized to $d_{SDE,max}$                        |
| SEE                 | $l_{SEE,0}$          | m                     | 0.4           | Geyer et al. (2003)                                      | tendon's rest length, alias $l_{rest}$ in Geyer et al. (2003)                                       |
|                     | $\Delta U_{SEE,nll}$ | [ ]                   | 0.0425        | Mörl et al. (2012)                                       | relative stretch at non-linear linear transition                                                    |
|                     | $\Delta U_{SEE,l}$   | [ ]                   | 0.017         | Mörl et al. (2012)                                       | relative additional stretch in the linear part providing a force increase of $\Delta F_{SEE,0}$     |
|                     | $\Delta F_{SEE,0}$   | N                     | 0.4 $F_{max}$ | Bayer et al. (2017)                                      | both force at the transition and force increase in the linear part                                  |
| Hatze               | $m$                  | 1/s                   | 11.3          | Kistemaker et al. (2006)                                 | inverse of time constant for the activation dynamics ( $1/\tau$ , $\tau$ defined in TABLE 1)        |
|                     | $c$                  | mol/l                 | 1.37e-4       | Kistemaker et al. (2006)                                 | constant for the activation dynamics                                                                |
|                     | $\mu$                | l/mol                 | 5.27e4        | Kistemaker et al. (2006)                                 | constant for the activation dynamics                                                                |
|                     | $k$                  | [ ]                   | 2.9           | Kistemaker et al. (2006)                                 | constant for the activation dynamics                                                                |
|                     | $q_0$                | [ ]                   | 0.005         | Kistemaker et al. (2006)                                 | resting active state for all activated muscle fibers                                                |
|                     | $\nu$                | [ ]                   | 3             | Kistemaker et al. (2006)                                 | constant for the activation dynamics                                                                |

## REFERENCES

1. Geyer H, Seyfarth A, and Blickhan R. Positive force feedback in bouncing gaits? Proceedings of the Royal Society of London. Series B: Biological Sciences 2003;270:2173–83. DOI: 10.1098/rspb.2003.2454.
2. Bayer A, Schmitt S, Günther M, and Haeufle D. The influence of biophysical muscle properties on simulating fast human arm movements. Computer methods in biomechanics and biomedical engineering 2017;20:803–21. DOI: 10.1080/10255842.2017.1293663.
3. Kistemaker DA, Van Soest AJ, and Bobbert MF. Is equilibrium point control feasible for fast goal-directed single-joint movements? Journal of Neurophysiology 2006;95:2898–912. DOI: 10.1152/jn.00983.2005.
4. Mörl F, Siebert T, Schmitt S, Blickhan R, and Guenther M. Electro-mechanical delay in Hill-type muscle models. Journal of Mechanics in Medicine and Biology 2012;12:1250085. DOI: 10.1142/s0219519412500856.
5. Soest AJ van and Bobbert MF. The contribution of muscle properties in the control of explosive movements. Biological Cybernetics 1993;69:195–204. DOI: 10.1007/BF00198959.
